# Supplementary material for: Systemic Homeostasis in Metabolome, Ionome, and Microbiome of Wild Yellowfin Goby in Estuarine Ecosystem
Source: PubMed Central journal article supplement (PMC5823927; doi:10.1038/s41598-018-20120-x), 2018-02-22
Supplement: 41598_2018_20120_MOESM1_ESM.pdf [file 41598_2018_20120_MOESM1_ESM.pdf]

SUPPORTING INFORMATION for:

## **Systemic Homeostasis in Metabolome, Ionome and Microbiome of Wild Yellowfin Goby in Estuarine Ecosystem**

Feifei Wei<sup>1</sup>, Kenji Sakata<sup>1</sup>, Taiga Asakura<sup>1,2</sup>, Yasuhiro Date<sup>1,2</sup>, and Jun Kikuchi<sup>\*,1,2,3</sup>

<sup>1</sup>RIKEN Center for Sustainable Resource Science, 1-7-22 Suehiro-cho, Tsurumi-ku, Yokohama 235-0045, Japan

<sup>2</sup>Graduate School of Medical Life Science, Yokohama City University, 1-7-29 Suehirocho, Tsurumi-ku, Yokohama 230-0045, Japan

<sup>3</sup>Graduate School of Bioagricultural Sciences and School of Agricultural Sciences, Nagoya University, 1 Furo-cho, Chikusa-ku, Nagoya 464-8601, Japan

Contents:

**Table S1.** Distribution of body length, body weight, BMI and GSI in the groups clustered using x-means.

**Table S2.** Top muscle NMR spectral peaks extracted from PLS-DA loading plots.

**Table S3.** Sample list of pooled yellowfin goby in the present study.

**Table S4.** Sample list of yellowfin goby in the present study. (Attached as an Excel file)

**Table S5.** ICP-OES datasets of muscle, gut contents, river water and sediment of the yellowfin goby living systems. (Attached as an Excel file)

**Table S6.** Intestinal microbial profiles (family level) of yellowfin goby. (Attached as an Excel file)

**Table S7.** NMR signal annotation of yellowfin goby muscle extracts using Methanol-*d*<sub>4</sub>.

**Table S8.** Microorganism name list highlighted in the network analysis.

**Figure S1.** PLS-DA analysis of muscle NMR spectral data of yellowfin goby fish. **(A)** score plot; **(B)** loading plots of PLS1 and PLS2. The top 30 NMR peaks in the loading plots were assigned and summarized in Table S2. The color of groups was consistent with x-means clusters in Figures 2 and Tables S1.

**Figure S2.** The average temperature of Sendai City and Yokohama City from years 2011 to 2013.

**Figure S3.** PCA score plots (PC1 vs. PC2) of NMR-based metabolic profiling, ICP-OES-based elemental profiling and Miseq-based microbial profiling of the living system of pooled yellowfin goby.

**Figure S4.** The similarity score of yellowfin goby ecosystems.

**Figure S5.** Correlation network analysis of metabolome, inonome and microbiome of the pooled yellowfin goby samples.

**Figure S6.** MBA network analyses of integral data sets obtained by pooled yellowfin goby, which partial highlighted by salinity with internal microbiota.

**Figure S7.** **(A)**  $^1\text{H}$ - $^{13}\text{C}$  HSQC spectrum and **(B)** ~ **(E)** expansions of yellowfin goby muscle extracts using methanol- $d_4$ .

**Figure S8.** NMR signal annotation of lipids in yellowfin goby muscle extracts using methanol- $d_4$ . Distinguishable signals between **(A)** phosphatidylethanolamine and phosphatidylcholine; **(B)** n-3 fatty acids and non n-3 fatty acids; **(C)** 22:6 n-3 fatty acid and non 22:6 n-3 fatty acids.

**Table S1.** Distribution of body length, body weight, BMI and GSI in the groups clustered using x-means.

| x-means cluster | body length           |                          | body weight          |                        | BMI                  |                        | GSI                 |                        |
|-----------------|-----------------------|--------------------------|----------------------|------------------------|----------------------|------------------------|---------------------|------------------------|
|                 | top1/4 (>14.7cm)<br>% | bottom1/4 (<10.5cm)<br>% | top1/4 (>23.6g)<br>% | bottom1/4 (<8.4g)<br>% | top1/4 (>10.20)<br>% | bottom1/4 (<7.06)<br>% | top1/4 (>2.60)<br>% | bottom1/4 (<0.39)<br>% |
| <b>black</b>    | 15.69                 | 2.28                     | 16.43                | 0.82                   | 15.06                | 0.93                   | 4.05                | 2.18                   |
| <b>red</b>      | 6.75                  | 5.46                     | 6.94                 | 4.59                   | 7.37                 | 5.92                   | 1.97                | 2.49                   |
| <b>green</b>    | 1.89                  | 9.73                     | 1.73                 | 11.33                  | 2.18                 | 11.11                  | 0.10                | 1.14                   |
| <b>blue</b>     | 0.20                  | 6.16                     | 0.00                 | 7.65                   | 0.31                 | 6.85                   | 0.00                | 0.31                   |

**Table S2.** Top muscle NMR spectral peaks extracted from PLS-DA loading plots.

| $\delta_H$ (ppm) | PLS1    | PLS2    | assignment               |
|------------------|---------|---------|--------------------------|
| 0.98             | -0.1910 | 0.1731  | leucine                  |
| 1.05             | -0.1860 | 0.1680  | valine                   |
| 1.27             | 0.0501  | -0.1186 | FA                       |
| 1.30             | 0.1396  | 0.1093  | lactate                  |
| 1.44             | -0.0602 | 0.1661  | alanine                  |
| 1.60             | -0.1708 | 0.1981  | cholesterol, non 22:6 FA |
| 2.10             | -0.1608 | 0.1589  | proline                  |
| 3.01             | 0.1214  | -0.0225 | creatine                 |
| 3.30             | 0.0320  | -0.0986 | taurine                  |
| 3.56             | -0.0611 | 0.1709  | alanine                  |
| 3.84             | 0.1241  | -0.0814 | creatine                 |
| 4.12             | -0.1100 | -0.1967 | inosine                  |
| 4.21             | 0.1725  | 0.0536  | IMP                      |
| 4.31             | -0.0975 | -0.1595 | inosine                  |
| 4.39             | 0.1682  | 0.0702  | IMP                      |
| 4.41             | -0.0296 | -0.1170 | (sn-1) TAG PC/PE         |
| 4.61             | -0.1214 | -0.2049 | inosine                  |
| 4.69             | 0.1619  | 0.0650  | IMP                      |
| 6.00             | -0.1153 | -0.1930 | inosine                  |
| 6.07             | 0.1729  | 0.0629  | IMP                      |
| 6.75             | -0.1552 | 0.1373  | tyrosine                 |
| 7.11             | -0.1723 | 0.1405  | tyrosine                 |
| 7.30             | -0.1719 | 0.1665  | phenylalanine            |
| 7.31             | -0.1814 | 0.1655  | phenylalanine            |
| 7.33             | -0.1839 | 0.1615  | phenylalanine            |
| 7.35             | -0.1554 | 0.1847  | phenylalanine            |
| 8.04             | 0.1573  | 0.0623  | IMP                      |
| 8.05             | -0.0960 | -0.1604 | inosine                  |
| 8.32             | -0.1109 | -0.1918 | inosine                  |
| 8.47             | 0.1682  | 0.0482  | IMP                      |

**Table S3.** Sample list of pooled yellowfin goby in the present study.

| <b>Group Number<sup>a</sup></b> | <b>Year</b> | <b>Season<sup>b</sup></b> | <b>River/Harbor</b> | <b>Location</b>               |
|---------------------------------|-------------|---------------------------|---------------------|-------------------------------|
| 1                               | 2011        | Autumn                    | Tsurumi River       | 35°28'41.35"N, 139°40'59.71"E |
| 2                               | 2011        | winter                    | Tsurumi River       | 35°28'41.35"N, 139°40'59.71"E |
| 3                               | 2012        | summer                    | Tsurumi River       | 35°28'41.35"N, 139°40'59.71"E |
| 4                               | 2012        | Autumn                    | Tsurumi River       | 35°28'41.35"N, 139°40'59.71"E |
| 5                               | 2012        | winter                    | Tsurumi River       | 35°28'41.35"N, 139°40'59.71"E |
| 6                               | 2013        | summer                    | Tsurumi River       | 35°28'41.35"N, 139°40'59.71"E |
| 7                               | 2013        | Autumn                    | Tsurumi River       | 35°28'41.35"N, 139°40'59.71"E |
| 8                               | 2013        | winter                    | Tsurumi River       | 35°28'41.35"N, 139°40'59.71"E |
| 9                               | 2014        | summer                    | Tsurumi River       | 35°28'41.35"N, 139°40'59.71"E |
| 10                              | 2014        | Autumn                    | Tsurumi River       | 35°28'41.35"N, 139°40'59.71"E |
| 11                              | 2011        | summer                    | Tama River          | 35°31'37.91"N, 139°47'26.86"E |
| 12                              | 2011        | Autumn                    | Tama River          | 35°31'37.91"N, 139°47'26.86"E |
| 13                              | 2011        | winter                    | Tama River          | 35°31'37.91"N, 139°47'26.86"E |
| 14                              | 2012        | summer                    | Tama River          | 35°31'37.91"N, 139°47'26.86"E |
| 15                              | 2012        | Autumn                    | Tama River          | 35°31'37.91"N, 139°47'26.86"E |
| 16                              | 2012        | Autumn                    | Tama River          | 35°31'37.91"N, 139°47'26.86"E |
| 17                              | 2013        | summer                    | Tama River          | 35°31'37.91"N, 139°47'26.86"E |
| 18                              | 2013        | Autumn                    | Tama River          | 35°31'37.91"N, 139°47'26.86"E |
| 19                              | 2013        | winter                    | Tama River          | 35°31'37.91"N, 139°47'26.86"E |
| 20                              | 2014        | summer                    | Tama River          | 35°31'37.91"N, 139°47'26.86"E |
| 21                              | 2011        | Autumn                    | Abukuma River       | 38° 2'55.00"N, 140°55'19.00"E |
| 22                              | 2011        | winter                    | Abukuma River       | 38° 2'55.00"N, 140°55'19.00"E |
| 23                              | 2011        | winter                    | Abukuma River       | 38° 2'55.00"N, 140°55'19.00"E |
| 24                              | 2012        | Autumn                    | Abukuma River       | 38° 2'55.00"N, 140°55'19.00"E |
| 25                              | 2012        | winter                    | Abukuma River       | 38° 2'55.00"N, 140°55'19.00"E |
| 26                              | 2013        | summer                    | Abukuma River       | 38° 2'55.00"N, 140°55'19.00"E |
| 27                              | 2013        | Autumn                    | Abukuma River       | 38° 2'55.00"N, 140°55'19.00"E |
| 28                              | 2014        | Autumn                    | Abukuma River       | 38° 2'55.00"N, 140°55'19.00"E |
| 29                              | 2011        | Autumn                    | Natori River        | 38°10'34.55"N, 140°57'24.33"E |
| 30                              | 2011        | winter                    | Natori River        | 38°10'34.55"N, 140°57'24.33"E |
| 31                              | 2011        | winter                    | Natori River        | 38°10'34.55"N, 140°57'24.33"E |
| 32                              | 2012        | Autumn                    | Natori River        | 38°10'34.55"N, 140°57'24.33"E |

|    |       |        |                    |                               |
|----|-------|--------|--------------------|-------------------------------|
| 33 | 2012  | winter | Natori River       | 38°10'34.55"N, 140°57'24.33"E |
| 34 | 2012  | winter | Natori River       | 38°10'34.55"N, 140°57'24.33"E |
| 35 | 2013  | Autumn | Natori River       | 38°10'34.55"N, 140°57'24.33"E |
| 36 | 2011  | summer | Sagami River       | 35°18'53.52"N, 139°22'5.42"E  |
| 37 | 2011  | Autumn | Sagami River       | 35°18'53.52"N, 139°22'5.42"E  |
| 38 | 2011  | winter | Sagami River       | 35°18'53.52"N, 139°22'5.42"E  |
| 39 | 2012  | summer | Sagami River       | 35°18'53.52"N, 139°22'5.42"E  |
| 40 | 2012  | Autumn | Sagami River       | 35°18'53.52"N, 139°22'5.42"E  |
| 41 | 2013  | Autumn | Sagami River       | 35°18'53.52"N, 139°22'5.42"E  |
| 42 | 2013  | winter | Sagami River       | 35°18'53.52"N, 139°22'5.42"E  |
| 43 | mixed | mixed  | Keihin-Unga River  | 35°37'51.61"N, 139°45'11.72"E |
| 44 | mixed | mixed  | Horiwari River     | 35°25'3"N, 139°37'35.9"E      |
| 45 | mixed | mixed  | Yokohama Harbor    | 35°27'2.12"N139°39'56.41"E    |
| 46 | mixed | mixed  | Arakawa River      | 35°38'49.08"N, 139°50'44.16"E |
| 47 | mixed | mixed  | Kyu-nakagawa River | 35°42'2.09"N139°50'26.01"E    |
| 48 | mixed | mixed  | Tatumi-Unga River  | 35°38'44.77"N139°48'23.40"E   |
| 49 | mixed | mixed  | Yokojikken River   | 35°40'56.72"N139°49'13.87"E   |
| 50 | mixed | mixed  | Teizan-Unga River  | 38°18'4.16"N, 141° 2'10.91"E  |
| 51 | mixed | mixed  | Shiogama Harbor    | 38°19'25.09"N141° 2'53.96"E   |
| 52 | mixed | mixed  | Shiogama Harbor    | 38°19'25.09"N141° 2'53.96"E   |
| 53 | mixed | mixed  | Yougai Harbor      | 38°17'18.03"N, 141° 4'15.94"E |
| 54 | mixed | mixed  | Muku River         | 34°41'13.11"N, 135°22'2.00"E  |
| 55 | mixed | mixed  | Yodo River         | 34°40'55.42"N, 135°25'2.98"E  |
| 56 | mixed | mixed  | Ibi River          | 35°13'18.64"N, 136°37'0.31"E  |
| 57 | mixed | mixed  | Ota river          | 34°21'38.68"N, 132°24'21.58"E |
| 58 | mixed | mixed  | Kiso River         | 35°14'2.94"N, 136°51'37.99"E  |
| 59 | mixed | mixed  | Kyu-ota River      | 34°21'10.48"N, 132°26'11.74"E |
| 60 | mixed | mixed  | Syonai River       | 35° 4'56.32"N, 136°50'28.99"E |
| 61 | mixed | mixed  | Nagara River       | 35° 1'36.57"N, 136°43'3.70"E  |
| 62 | mixed | mixed  | lioka Harbor       | 35°41'31.39"N140°43'28.29"E   |
| 63 | mixed | mixed  | Kurose River       | 34°13'40.04"N, 132°36'17.11"E |
| 64 | mixed | mixed  | Saigawa River      | 36°36'4.58"N, 136°35'10.66"E  |
| 65 | mixed | mixed  | Otaru Harbor       | 43°11'28.96"N, 141° 1'7.60"E  |
| 66 | mixed | mixed  | Kinokawa River     | 34°13'16.92"N, 135° 8'13.08"E |

---

<sup>a</sup>The group number is consistent with that in **Tables S5** and **S6**.

<sup>b</sup> Season was defined as: May~Sep, summer; Oct~Nov, autumn; Dec~Jan, winter.

**Table S7.** NMR signal annotation of yellowfin goby muscle extracts using Methanol-*d*4.

| <b>Peak Number<sup>a</sup></b> | <b><math>\delta_{\text{H}}</math> (ppm)</b> | <b><math>\delta_{\text{C}}</math> (ppm)</b> | <b>Annotation</b>  |
|--------------------------------|---------------------------------------------|---------------------------------------------|--------------------|
| 1                              | 1.85                                        | 33.3                                        | cholesterol        |
| 2                              | 6.74                                        | 118.1                                       | tyrosine           |
| 3                              | 1.01                                        | 19.2                                        | valine             |
| 4                              | 8.49                                        | 142.3                                       | AMP                |
| 5                              | 1.16                                        | 26.5                                        | cholesterol        |
| 6                              | 0.98                                        | 24.8                                        | leucine            |
| 7                              | 8.45                                        | 142.3                                       | IMP                |
| 8                              | 3.36                                        | 48.5                                        | proline            |
| 9                              | 0.96                                        | 23.3                                        | leucine            |
| 10                             | 3.69                                        | 56.8                                        | methionine         |
| 11                             | 3.01                                        | 40.2                                        | phenylalanine      |
| 12                             | 3.72                                        | 56.8                                        | methionine         |
| 13                             | 3.98                                        | 58.5                                        | creatinine         |
| 14                             | 1.05                                        | 20.7                                        | valine             |
| 15                             | 7.99                                        | 147.7                                       | hypoxanthine       |
| 16                             | 3.58                                        | 71.9                                        | tyrosine           |
| 17                             | 1.46                                        | 33.9                                        | cholesterol        |
| 18                             | 3.47                                        | 70.6                                        | acetylcholine      |
| 19                             | 4.42                                        | 65.1                                        | (sn-1) TAG type I  |
| 20                             | 5.16                                        | 74.7                                        | (sn-2) TAG type II |
| 21                             | 8.31                                        | 142.6                                       | inosine            |
| 22                             | 1.01                                        | 38.9                                        | cholesterol        |
| 23                             | 1.67                                        | 27.4                                        | non 22:6 FA        |
| 24                             | 4.17                                        | 65.3                                        | (sn-1) TAG         |
| 25                             | 8.36                                        | 142.5                                       | AMP                |
| 26                             | 7.62                                        | 138.2                                       | histidine          |
| 27                             | 1.00                                        | 59.7                                        | cholesterol        |
| 28                             | 8.05                                        | 148.3                                       | inosine            |
| 29                             | 1.76                                        | 33.9                                        | cholesterol        |
| 30                             | 1.52                                        | 30.6                                        | cholesterol        |
| 31                             | 2.39                                        | 36.5                                        | 22:6 n-3 FA        |
| 32                             | 1.05                                        | 40.0                                        | cholesterol        |



|    |      |       |                          |
|----|------|-------|--------------------------|
| 33 | 1.85 | 30.8  | cholesterol              |
| 34 | 8.11 | 143.5 | hypoxanthine             |
| 35 | 4.03 | 64.7  | phosphatidylethanolamine |
| 36 | 3.01 | 31.2  | histidine                |
| 37 | 1.11 | 59.1  | cholesterol              |
| 38 | 1.13 | 42.1  | cholesterol              |
| 39 | 3.21 | 31.2  | histidine                |
| 40 | 0.93 | 53.2  | cholesterol              |
| 41 | 4.69 | 77.7  | IMP                      |
| 42 | 5.36 | 134.2 | OF UFA                   |
| 43 | 1.52 | 23.7  | cholesterol              |
| 44 | 5.22 | 73.3  | (sn-2) TAG               |
| 45 | 4.39 | 74.1  | IMP                      |
| 46 | 6.07 | 90.7  | IMP                      |
| 47 | 3.02 | 32.4  | creatinine               |
| 48 | 0.98 | 16.1  | n-3 FA                   |
| 49 | 3.13 | 43.1  | phosphatidylethanolamine |
| 50 | 4.21 | 87.7  | IMP                      |
| 51 | 2.20 | 44.4  | cholesterol              |
| 52 | 5.33 | 124.0 | cholesterol              |
| 53 | 1.38 | 38.7  | cholesterol              |
| 54 | 1.59 | 27.6  | cholesterol, non 22:6 FA |
| 55 | 4.07 | 67.3  | AMP                      |
| 56 | 3.77 | 57.9  | histidine                |
| 57 | 2.32 | 36.5  | non 22:6 n-3 FA          |
| 58 | 0.71 | 13.8  | cholesterol              |
| 59 | 3.98 | 66.4  | (sn-3) TAG               |
| 60 | 4.61 | 77.7  | inosine                  |
| 61 | 4.12 | 89.0  | inosine                  |
| 62 | 3.57 | 53.2  | alanine                  |
| 63 | 4.31 | 73.6  | inosine                  |
| 64 | 6.00 | 92.1  | inosine                  |
| 65 | 1.30 | 25.2  | non n-3 FA               |
| 66 | 1.01 | 21.4  | cholesterol              |
| 67 | 0.93 | 20.7  | cholesterol              |
| 68 | 5.33 | 132.3 | OF UFA                   |

|    |      |       |                     |
|----|------|-------|---------------------|
| 69 | 1.44 | 18.9  | alanine             |
| 70 | 0.86 | 16.0  | non n-3 FA          |
| 71 | 1.27 | 34.6  | FA                  |
| 72 | 4.27 | 61.9  | phosphatidylcholine |
| 73 | 0.92 | 16.0  | non n-3 FA          |
| 74 | 0.86 | 24.5  | cholesterol_22      |
| 75 | 2.02 | 29.6  | UFA                 |
| 76 | 3.62 | 68.9  | phosphatidylcholine |
| 77 | 3.82 | 68.6  | betaine             |
| 78 | 5.35 | 130.7 | OF UFA              |
| 79 | 2.83 | 28.0  | PUFA                |
| 80 | 3.97 | 71.0  | lactate             |
| 81 | 3.05 | 50.7  | taurine             |
| 82 | 3.28 | 38.9  | taurine             |
| 83 | 3.36 | 44.1  | glycine             |
| 84 | 1.30 | 23.2  | lactate             |
| 85 | 3.25 | 55.3  | betaine             |
| 86 | 3.21 | 56.2  | phosphatidylcholine |
| 87 | 3.01 | 39.3  | creatine            |
| 88 | 3.84 | 56.8  | creatine            |
| 89 | 1.27 | 32.3  | FA                  |
| 90 | 2.13 | 29.1  | glutamine           |
| 91 | 2.28 | 32.0  | valine,proline      |
| 92 | 2.44 | 34.0  | glutamine           |
| 93 | 2.09 | 31.9  | proline             |
| 94 | 7.30 | 131.7 | phenylalanine       |
| 95 | 7.11 | 132.9 | tyrosine            |
| 96 | 1.76 | 27.2  | leucine             |
| 97 | 3.90 | 58.6  | tyrosine            |
| 98 | 8.04 | 147.7 | IMP                 |
| 99 | 1.32 | 32.0  | FA                  |

---

<sup>a</sup> The peak number is consistent with that in **Figure S7**.

**Table S8.** Microorganism name list highlighted in the network analysis.

| <b>Microorganism Number<sup>a</sup></b> | <b>Microorganism Name</b>                                                                      |
|-----------------------------------------|------------------------------------------------------------------------------------------------|
| MB_1                                    | <i>Bacteria.Firmicutes.Bacilli.Lactobacillales.Carnobacteriaceae.Carnobacterium</i>            |
| MB_2                                    | <i>Bacteria.TM7.TM7.3.I025..</i>                                                               |
| MB_3                                    | <i>Bacteria.Verrucomicrobia.Other.Other.Other</i>                                              |
| MB_4                                    | <i>Bacteria.Actinobacteria.Acidimicrobiia.Acidimicrobiales.koll13.mixed</i>                    |
| MB_5                                    | <i>Bacteria.Bacteroidetes.Cytophagia.Cytophagales.Cyclobacteriaceae.</i>                       |
| MB_6                                    | <i>Bacteria.Proteobacteria.Betaproteobacteria.Other.Other.Other</i>                            |
| MB_7                                    | <i>Bacteria.Proteobacteria.Gammaproteobacteria.Vibrionales.Other.Other</i>                     |
| MB_8                                    | <i>Bacteria.Actinobacteria.Actinobacteria.Actinomycetales.Williamsiaceae.Williamsia</i>        |
| MB_9                                    | <i>Bacteria.Firmicutes.Bacilli.Lactobacillales.Enterococcaceae.Vagococcus</i>                  |
| MB_10                                   | <i>Bacteria.Proteobacteria.Gammaproteobacteria.Alteromonadales.Alteromonadaceae.BD2.13</i>     |
| MB_11                                   | <i>Bacteria.Cyanobacteria.Nostocophycideae.Nostocales.Nostocaceae.Other</i>                    |
| MB_12                                   | <i>Bacteria.Cyanobacteria.Synechococcophycideae.Synechococcales.Synechococcaceae.Other</i>     |
| MB_13                                   | <i>Bacteria.Firmicutes.Bacilli.Bacillales.Staphylococcaceae.Other</i>                          |
| MB_14                                   | <i>Bacteria.Proteobacteria.Betaproteobacteria.Burkholderiales.Oxalobacteraceae.Massilia</i>    |
| MB_15                                   | <i>Bacteria.Proteobacteria.Alphaproteobacteria.Rhizobiales.Bradyrhizobiaceae.Bosea</i>         |
| MB_16                                   | <i>Bacteria.Proteobacteria.Gammaproteobacteria.Xanthomonadales.Xanthomonadaceae.Other</i>      |
| MB_17                                   | <i>Bacteria.Firmicutes.Bacilli.Lactobacillales.Aerococcaceae.Other</i>                         |
| MB_18                                   | <i>Bacteria.Actinobacteria.Actinobacteria.Actinomycetales.Microbacteriaceae.Rathayibacter</i>  |
| MB_19                                   | <i>Bacteria.Bacteroidetes.Bacteroidia.Bacteroidales.Prevotellaceae.Prevotella</i>              |
| MB_20                                   | <i>Bacteria.Bacteroidetes.Flavobacteriia.Flavobacteriales..</i>                                |
| MB_21                                   | <i>Bacteria.Proteobacteria.Alphaproteobacteria.Rickettsiales.mitochondria.</i>                 |
| MB_22                                   | <i>Bacteria.Chloroflexi.Anaerolineae.Caldilineales.Caldilineaceae.Other</i>                    |
| MB_23                                   | <i>Bacteria.Actinobacteria.Actinobacteria.Actinomycetales.Nocardioideaceae.</i>                |
| MB_24                                   | <i>Bacteria.Proteobacteria.Gammaproteobacteria.HOC36..</i>                                     |
| MB_25                                   | <i>Bacteria.Proteobacteria.Alphaproteobacteria.Rhizobiales.Xanthobacteraceae.Other</i>         |
| MB_26                                   | <i>Bacteria.Actinobacteria.Thermoleophilia.Solirubrobacterales..</i>                           |
| MB_27                                   | <i>Bacteria.Planctomycetes.Planctomycetia.Gemmatales.Gemmataceae.Gemmata</i>                   |
| MB_28                                   | <i>Bacteria.Actinobacteria.Actinobacteria.Actinomycetales.Actinomycetaceae.Varibaculum</i>     |
| MB_29                                   | <i>Bacteria.Actinobacteria.Actinobacteria.Actinomycetales.Nocardioideaceae.Propionicimonas</i> |
| MB_30                                   | <i>Bacteria.Firmicutes.Clostridia.Clostridiales.Veillonellaceae.Veillonella</i>                |
| MB_31                                   | <i>Bacteria.Firmicutes.Bacilli.Other.Other.Other</i>                                           |
| MB_32                                   | <i>Bacteria.Chloroflexi.Anaerolineae.Caldilineales.Caldilineaceae.Caldilinea</i>               |

MB\_33 *Bacteria.Firmicutes.Clostridia.Clostridiales..Tissierellaceae..Finegoldia*  
 MB\_34 *Bacteria.Bacteroidetes.Other.Other.Other.Other*  
 MB\_35 *Bacteria.Actinobacteria.Thermoleophilia...*  
 MB\_36 *Bacteria.Firmicutes.Clostridia.Clostridiales.Lachnospiraceae.Other*  
 MB\_37 *Archaea.Crenarchaeota.Thaumarchaeota.Nitrososphaerales.Nitrososphaeraceae.Candidatus.Nitrososphaera*  
 MB\_38 *Unclassified.Other.Other.Other.Other.Other*  
 MB\_39 *Bacteria.Proteobacteria.Gammaproteobacteria.Legionellales.Coxiellaceae.Rickettsiella*  
 MB\_40 *Bacteria.Proteobacteria.Alphaproteobacteria.Rickettsiales.mitochondria.Thalassiosira*  
 MB\_41 *Bacteria.Fusobacteria.Fusobacteriia.Fusobacteriales.Leptotrichiaceae.Leptotrichia*  
 MB\_42 *Bacteria.Firmicutes.Clostridia.Clostridiales.Lachnospiraceae.Dorea*  
 MB\_43 *Bacteria.Bacteroidetes.Flavobacteriia.Flavobacteriales..Weeksellaceae..Chryseobacterium*  
 MB\_44 *Bacteria.Proteobacteria.Alphaproteobacteria.Rhizobiales.Phylobacteriaceae.*  
 MB\_45 *Bacteria.Chloroflexi.Anaerolineae.DRC31..*  
 MB\_46 *Bacteria.Proteobacteria.Gammaproteobacteria.Alteromonadales.Other.Other*  
 MB\_47 *Bacteria.Firmicutes.Bacilli.Lactobacillales.Enterococcaceae.Enterococcus*  
 MB\_48 *Bacteria.WS2.SHA.109...*  
 MB\_49 *Bacteria.Bacteroidetes..Rhodothermi...Rhodothermales..Other.Other*  
 MB\_50 *Bacteria.TM7....*  
 MB\_51 *Bacteria.TM7.TM7.3.I025.Rs.045.*  
 MB\_52 *Bacteria.Acidobacteria..Chloracidobacteria..RB41.Other.Other*  
 MB\_53 *Bacteria.Proteobacteria.Gammaproteobacteria.Pseudomonadales.Pseudomonadaceae.Pseudomonas*  
 MB\_54 *Bacteria..Thermi..Deinococci.Deinococcales.Deinococcaceae.Other*  
 MB\_55 *Bacteria.Proteobacteria.Alphaproteobacteria.Rhizobiales.Hyphomicrobiaceae.Polymorphum*  
 MB\_56 *Bacteria.Actinobacteria.Actinobacteria.Actinomycetales.Nocardioideaceae.Nocardioides*  
 MB\_57 *Bacteria.Proteobacteria.Gammaproteobacteria.Legionellales.Legionellaceae.Other*  
 MB\_58 *Bacteria.TM7.TM7.3.Other.Other.Other*  
 MB\_59 *Bacteria.Actinobacteria.Thermoleophilia.Gaiellales..*  
 MB\_60 *Bacteria.Cyanobacteria.Oscillatoriohyphycideae.Oscillatoriales.Phormidiaceae.Phormidium*  
 MB\_61 *Bacteria.Firmicutes.Clostridia.Clostridiales.Peptostreptococcaceae.*  
 MB\_62 *Bacteria.Acidobacteria.Acidobacteria.6.CCU21..*  
 MB\_63 *Bacteria.Chloroflexi.Gitt.GS.136...*  
 MB\_64 *Bacteria.Firmicutes.Bacilli.Bacillales.Bacillaceae.Other*  
 MB\_65 *Archaea.Euryarchaeota.Methanomicrobia.Methanosarcinales.Methanosarcinaceae.Methanosarcina*  
 MB\_66 *Bacteria.Actinobacteria....*  
 MB\_67 *Bacteria.Proteobacteria.Alphaproteobacteria.Rhizobiales.Methylocystaceae.Methylosinus*  
 MB\_68 *Bacteria.Actinobacteria.Thermoleophilia.Solirubrobacterales.Conexibacteraceae.*

MB\_69 *Bacteria.Chlamydiae.Chlamydia.Chlamydiales.Parachlamydiaceae.*

MB\_70 *Bacteria.Proteobacteria.Deltaproteobacteria.Desulfuromonadales.Desulfuromonadaceae.*

MB\_71 *Bacteria.Proteobacteria.Gammaproteobacteria.Pasteurellales.Pasteurellaceae.Haemophilus*

MB\_72 *Bacteria.Bacteroidetes.Bacteroidia.Bacteroidales.Bacteroidaceae.Bacteroides*

MB\_73 *Bacteria.Actinobacteria.Coriobacteriia.Coriobacteriales.Coriobacteriaceae.Collinsella*

MB\_74 *Bacteria.Proteobacteria.Alphaproteobacteria.Rhodospirillales.Acetobacteraceae.Roseomonas*

MB\_75 *Bacteria.Proteobacteria.Gammaproteobacteria.Alteromonadales.Shewanellaceae.Shewanella*

MB\_76 *Bacteria.Proteobacteria.Gammaproteobacteria.Enterobacteriales.Enterobacteriaceae.Yersinia*

MB\_77 *Bacteria.Proteobacteria.Alphaproteobacteria.Sphingomonadales.Sphingomonadaceae.Sphingobium*

MB\_78 *Bacteria.Proteobacteria.Gammaproteobacteria.Oceanospirillales.Oceanospirillaceae.Oleibacter*

MB\_79 *Bacteria.Actinobacteria.Actinobacteria.Actinomycetales.Nocardioideaceae.Pimelobacter*

MB\_80 *Bacteria.Bacteroidetes.Cytophagia.Cytophagales.Cytophagaceae.Hymenobacter*

MB\_81 *Bacteria.Proteobacteria.Gammaproteobacteria.Alteromonadales.Alteromonadaceae.Glaciecola*

MB\_82 *Bacteria.Proteobacteria.Gammaproteobacteria.Vibrionales.Vibrionaceae.Aliivibrio*

MB\_83 *Bacteria.Actinobacteria.Actinobacteria.Actinomycetales.Nocardioideaceae.Other*

MB\_84 *Bacteria.Firmicutes.Bacilli.Bacillales.Paenibacillaceae.Paenibacillus*

MB\_85 *Bacteria.Actinobacteria.Acidimicrobia.Acidimicrobiales.EB1017.*

MB\_86 *Bacteria.Firmicutes.Clostridia.Clostridiales.Peptostreptococcaceae.Clostridium*

MB\_87 *Bacteria.Proteobacteria.Deltaproteobacteria.Desulfobacteriales.Desulfobacteraceae.Other*

MB\_88 *Bacteria.Proteobacteria.Alphaproteobacteria.Rickettsiales..*

MB\_89 *Bacteria.Proteobacteria.Gammaproteobacteria.Xanthomonadales.Sinobacteraceae.*

MB\_90 *Bacteria.Proteobacteria.Alphaproteobacteria.Rhizobiales.Rhizobiaceae.Agrobacterium*

MB\_91 *Bacteria.Proteobacteria.Gammaproteobacteria.Legionellales.Other.Other*

MB\_92 *Bacteria.Proteobacteria.Deltaproteobacteria.Desulfobacteriales.Desulfobacteraceae.Desulfococcus*

MB\_93 *Bacteria.Cyanobacteria.Oscillatoriothycideae.Oscillatoriales.Phormidiaceae.Other*

MB\_94 *Bacteria.Cyanobacteria.Chloroplast.Cercozoa..*

MB\_95 *Bacteria.Actinobacteria.Actinobacteria.Actinomycetales.Micrococcaceae.Rothia*

MB\_96 *Bacteria.Proteobacteria.Betaproteobacteria.Methylophilales.Methylophilaceae.Methylotenera*

MB\_97 *Bacteria.Bacteroidetes.Cytophagia.Cytophagales.Cytophagaceae.*

MB\_98 *Bacteria.Actinobacteria.Actinobacteria.Other.Other.Other*

MB\_99 *Bacteria.Cyanobacteria.Chloroplast.Chlorophyta.Chlamydomonadaceae.*

MB\_100 *Bacteria.Firmicutes.Clostridia.Clostridiales.Lachnospiraceae.Blautia*

MB\_101 *Bacteria.Verrucomicrobia.Verrucomicrobiae.Verrucomicrobiales.Verrucomicrobiaceae.Persicirhabdus*

MB\_102 *Bacteria.Proteobacteria.Alphaproteobacteria.Sphingomonadales.Sphingomonadaceae.Kaistobacter*

MB\_103 *Bacteria.Actinobacteria.Actinobacteria.Actinomycetales.Brevibacteriaceae.Brevibacterium*

MB\_104 *Bacteria.Chlamydiae.Chlamydia.Chlamydiales.Other.Other*

MB\_105 *Bacteria.Firmicutes.Clostridia.Clostridiales.Veillonellaceae.Megamonas*

MB\_106 *Bacteria.Actinobacteria.Acidimicrobia.Acidimicrobiales.koll13.*

MB\_107 *Bacteria.Proteobacteria.Alphaproteobacteria.Rhodobacterales.Rhodobacteraceae.Paracoccus*

MB\_108 *Bacteria.Proteobacteria.Alphaproteobacteria.Caulobacterales.Caulobacteraceae.Caulobacter*

MB\_109 *Bacteria.Chloroflexi.Anaerolineae.A31.S47.*

MB\_110 *Bacteria.Actinobacteria.Actinobacteria.Actinomycetales.Geodermatophilaceae.Other*

MB\_111 *Bacteria.Firmicutes.Bacilli.Lactobacillales.Aerococcaceae.*

MB\_112 *Bacteria.Actinobacteria.Acidimicrobia.Acidimicrobiales.koll13.Other*

MB\_113 *Bacteria.Proteobacteria.Other.Other.Other.Other*

MB\_114 *Bacteria.Proteobacteria.Gammaproteobacteria.Alteromonadales.Alteromonadaceae.Other*

MB\_115 *Bacteria.Firmicutes.Clostridia.Clostridiales.Clostridiaceae.Clostridium*

MB\_116 *Bacteria.Verrucomicrobia.Verrucomicrobiae.Verrucomicrobiales.Verrucomicrobiaceae.Other*

MB\_117 *Bacteria.Firmicutes.Clostridia.Clostridiales..Tissierellaceae..Peptoniphilus*

MB\_118 *Bacteria.Firmicutes.Bacilli.Bacillales.Planococcaceae.Other*

MB\_119 *Bacteria.Proteobacteria.Gammaproteobacteria.Alteromonadales.OM60.*

MB\_120 *Bacteria.Proteobacteria.Gammaproteobacteria.Alteromonadales.Colwelliaceae.Thalassomonas*

MB\_121 *Bacteria.Proteobacteria.Gammaproteobacteria.Alteromonadales..*

MB\_122 *Bacteria.Firmicutes.Bacilli.Bacillales.Other.Other*

MB\_123 *Bacteria.Proteobacteria.Alphaproteobacteria.Sphingomonadales.Other.Other*

MB\_124 *Bacteria.Firmicutes.Bacilli.Turicibacterales.Turicibacteraceae.Turicibacter*

MB\_125 *Bacteria.Verrucomicrobia.Verrucomicrobiae.Verrucomicrobiales.Verrucomicrobiaceae.Verrucomicrobium*

MB\_126 *Bacteria.Actinobacteria.Actinobacteria.Actinomycetales.Cellulomonadaceae.Demequina*

MB\_127 *Bacteria.Firmicutes.Clostridia.Clostridiales..Tissierellaceae..WAL\_1855D*

MB\_128 *Bacteria.Proteobacteria.Alphaproteobacteria.Other.Other.Other*

MB\_129 *Bacteria.Proteobacteria.Gammaproteobacteria.Alteromonadales.Alteromonadaceae.Marinobacter*

MB\_130 *Bacteria.Actinobacteria.Thermoleophilia.Solirubrobacterales.Other.Other*

MB\_131 *Archaea.Crenarchaeota.MCG.pGrfC26..*

MB\_132 *Bacteria.Verrucomicrobia.Verrucomicrobiae.Verrucomicrobiales.Verrucomicrobiaceae.Luteolibacter*

MB\_133 *Bacteria.Cyanobacteria.Oscillatoriothycideae.Chroococcales.Other.Other*

MB\_134 *Bacteria.Planctomycetes.Planctomycetia.Pirellulales.Pirellulaceae.Other*

MB\_135 *Bacteria.Verrucomicrobia.Verrucomicrobiae.Verrucomicrobiales.Verrucomicrobiaceae.Rubritalea*

MB\_136 *Bacteria.Proteobacteria.Alphaproteobacteria.Caulobacterales.Caulobacteraceae.*

MB\_137 *Bacteria.Proteobacteria.Alphaproteobacteria.Rhodobacterales.Rhodobacteraceae.Phaeobacter*

MB\_138 *Bacteria.Proteobacteria.Betaproteobacteria.Burkholderiales.Comamonadaceae.Acidovorax*

MB\_139 *Bacteria.Cyanobacteria.Synechococcophycideae.Pseudanabaenales.Pseudanabaenaceae.Leptolyngbya*

MB\_140 *Bacteria.Proteobacteria.Gammaproteobacteria.Legionellales.Francisellaceae.*

MB\_141 *Bacteria.Proteobacteria.Gammaproteobacteria..Marinicellales...Marinicellaceae..*

MB\_142 *Bacteria.WS5....*

MB\_143 *Bacteria.Chloroflexi.Ellin6529...*

MB\_144 *Bacteria.Proteobacteria.Deltaproteobacteria.Desulfobacteriales.Desulfobulbaceae.*

MB\_145 *Bacteria.Actinobacteria.Actinobacteria.Actinomycetales.Dermacoccaceae.Dermacoccus*

MB\_146 *Bacteria.Proteobacteria.Alphaproteobacteria.Rhizobiales.Bradyrhizobiaceae.Balneimonas*

MB\_147 *Bacteria.Actinobacteria.Actinobacteria.Actinomycetales.Microbacteriaceae.Leucobacter*

MB\_148 *Bacteria.Actinobacteria.Actinobacteria.Actinomycetales.Other.Other*

MB\_149 *Bacteria.Cyanobacteria.Chloroplast.Chlorophyta..*

MB\_150 *Bacteria.Planctomycetes.Planctomycetia.Pirellulales.Pirellulaceae.Planctomycete*

MB\_151 *Bacteria.Actinobacteria.Actinobacteria.Actinomycetales.Sporichthyaceae.*

MB\_152 *Bacteria.Proteobacteria.Deltaproteobacteria.Spirobacillales..*

MB\_153 *Bacteria.Bacteroidetes.Bacteroidia.Bacteroidales..Odoribacteraceae..Odoribacter*

MB\_154 *Bacteria.Proteobacteria.Gammaproteobacteria.Methylococcales.Methylococcaceae.Methylocaldum*

MB\_155 *Bacteria.Proteobacteria.Gammaproteobacteria.Enterobacteriales.Enterobacteriaceae.Escherichia*

MB\_156 *Bacteria.Firmicutes.Clostridia.Clostridiales.Lachnospiraceae..Ruminococcus.*

MB\_157 *Bacteria.Proteobacteria.Gammaproteobacteria.Legionellales.Legionellaceae.*

MB\_158 *Bacteria.Proteobacteria.Gammaproteobacteria.Pseudomonadales.Moraxellaceae.Enhydrobacter*

MB\_159 *Bacteria.Chloroflexi.Anaerolineae.Caldilineales.Caldilineaceae.*

MB\_160 *Bacteria.Proteobacteria.Gammaproteobacteria.Legionellales.Coxiellaceae.Other*

MB\_161 *Bacteria.Actinobacteria.Actinobacteria.Actinomycetales.Micrococcaceae.Micrococcus*

MB\_162 *Bacteria.Proteobacteria.Betaproteobacteria.Burkholderiales.Comamonadaceae.Aquabacterium*

MB\_163 *Bacteria.Proteobacteria.Betaproteobacteria.Methylophilales.Methylophilaceae.Other*

MB\_164 *Bacteria.Proteobacteria.Gammaproteobacteria.Xanthomonadales.Xanthomonadaceae.Stenotrophomonas*

MB\_165 *Bacteria.Proteobacteria.Alphaproteobacteria.Sphingomonadales.Sphingomonadaceae.Blastomonas*

MB\_166 *Bacteria.Actinobacteria.Acidimicrobia.Acidimicrobiales.Microthrixaceae.*

MB\_167 *Bacteria.Actinobacteria.Acidimicrobia.Acidimicrobiales.Other.Other*

MB\_168 *Bacteria.Proteobacteria.Alphaproteobacteria.Rhodobacterales.Rhodobacteraceae.Anaerospira*

MB\_169 *Bacteria.Actinobacteria.Actinobacteria.Bifidobacteriales.Bifidobacteriaceae.Bifidobacterium*

MB\_170 *Bacteria.Proteobacteria.Gammaproteobacteria.Chromatiales..*

MB\_171 *Bacteria.Bacteroidetes..Saprosirae...Saprosirales..Chitinophagaceae.Other*

MB\_172 *Bacteria.Chloroflexi.Anaerolineae.GCA004..*

MB\_173 *Bacteria.Proteobacteria.Alphaproteobacteria.Sphingomonadales.Sphingomonadaceae.Other*

MB\_174 *Bacteria.Proteobacteria.Alphaproteobacteria.Rhizobiales.Phylobacteriaceae.Mesorhizobium*

MB\_175 *Bacteria.Armatimonadetes.Armatimonadia.Armatimonadales.Armatimonadaceae.*

MB\_176 *Bacteria.Actinobacteria.Actinobacteria.Actinomycetales.Intrasporangiaceae.Other*

MB\_177 *Bacteria.Cyanobacteria.Nostocophycideae.Nostocales.Nostocaceae.*

MB\_178 *Bacteria.Proteobacteria.Gammaproteobacteria.Cardionobacteriales.Cardionobacteriaceae.Cardionobacterium*

MB\_179 *Bacteria.Actinobacteria.Rubrobacteria.Rubrobacteriales.Rubrobacteraceae.Rubrobacter*

MB\_180 *Bacteria.Proteobacteria.Alphaproteobacteria.Rhizobiales.Hyphomicrobiaceae.Hyphomicrobium*

MB\_181 *Bacteria.Actinobacteria.OPB41...*

MB\_182 *Bacteria.Actinobacteria.Actinobacteria.Actinomycetales.Dermabacteraceae.Brachybacterium*

MB\_183 *Bacteria.Firmicutes.Clostridia.Clostridiales.Other.Other*

MB\_184 *Bacteria.Proteobacteria.Gammaproteobacteria.Pseudomonadales.Pseudomonadaceae.Other*

MB\_185 *Bacteria.Actinobacteria.Actinobacteria.Actinomycetales.Microbacteriaceae.Other*

MB\_186 *Bacteria.Proteobacteria.Alphaproteobacteria.Rhizobiales..*

MB\_187 *Bacteria.Actinobacteria.Actinobacteria.Actinomycetales.Micromonosporaceae.Virgisporangium*

MB\_188 *Bacteria.Proteobacteria.Gammaproteobacteria.Alteromonadales..Chromatiaceae..*

MB\_189 *Bacteria.Actinobacteria.Acidimicrobia.Acidimicrobiales..*

MB\_190 *Bacteria.Verrucomicrobia..Spartobacteria...Chthoniobacteriales...Chthoniobacteraceae..DA101*

MB\_191 *Bacteria.Proteobacteria.Epsilonproteobacteria.Campylobacteriales.Helicobacteraceae.*

MB\_192 *Bacteria..Thermi..Deinococci.Deinococcales.Deinococcaceae.Deinococcus*

MB\_193 *Bacteria.Tenericutes.Mollicutes...*

MB\_194 *Bacteria.Proteobacteria.Deltaproteobacteria.Desulfobacteriales.Desulfobulbaceae.Other*

MB\_195 *Bacteria.Actinobacteria.Acidimicrobia.Acidimicrobiales.C111.*

MB\_196 *Bacteria.Proteobacteria.Alphaproteobacteria.Rhizobiales.Hyphomicrobiaceae.Other*

MB\_197 *Bacteria.Proteobacteria.Betaproteobacteria.Burkholderiales.Oxalobacteraceae.Other*

MB\_198 *Bacteria.Proteobacteria.Gammaproteobacteria.Oceanospirillales.Endozoicimonaceae.*

MB\_199 *Bacteria.Actinobacteria.Actinobacteria.Actinomycetales.Micrococcaceae.Kocuria*

MB\_200 *Bacteria.Proteobacteria.Alphaproteobacteria.Rhodobacteriales.Rhodobacteraceae.Rubellimicrobium*

MB\_201 *Bacteria.Firmicutes.Bacilli.Lactobacillales.Other.Other*

MB\_202 *Bacteria.Firmicutes.Bacilli.Lactobacillales.Streptococcaceae.Streptococcus*

MB\_203 *Bacteria.Firmicutes.Clostridia.Clostridiales..Tissierellaceae..Anaerococcus*

MB\_204 *Bacteria.Proteobacteria.Alphaproteobacteria.Rhizobiales.Hyphomicrobiaceae.Devosia*

MB\_205 *Bacteria.TM6.SJA.4...*

MB\_206 *Bacteria.Bacteroidetes.Flavobacteriia.Flavobacteriales.Flavobacteriaceae.Other*

MB\_207 *Bacteria.Proteobacteria.Gammaproteobacteria.34P16..*

MB\_208 *Bacteria.Firmicutes.Clostridia.Clostridiales.Ruminococcaceae.Other*

MB\_209 *Bacteria.Acidobacteria.Acidobacteria.6.iii1.15.mb2424.*

MB\_210 *Bacteria.Proteobacteria.Alphaproteobacteria.Rhizobiales.Other.Other*

MB\_211 *Bacteria.Firmicutes.Clostridia.Clostridiales.Clostridiaceae.Other*

MB\_212 *Bacteria.Actinobacteria.Actinobacteria.Actinomycetales.Intrasporangiaceae.Janibacter*



MB\_213 *Bacteria.Proteobacteria.Gammaproteobacteria.Pseudomonadales.Moraxellaceae.Psychrobacter*  
 MB\_214 *Bacteria.Actinobacteria.Actinobacteria.Actinomycetales.Propionibacteriaceae.Propionibacterium*  
 MB\_215 *Bacteria.Proteobacteria.Gammaproteobacteria.Vibrionales.Vibrionaceae.Vibrio*  
 MB\_216 *Bacteria.Bacteroidetes.Flavobacteriia.Flavobacteriales.Flavobacteriaceae.Flavobacterium*  
 MB\_217 *Bacteria.Actinobacteria.Actinobacteria.Actinomycetales.Mycobacteriaceae.Mycobacterium*  
 MB\_218 *Bacteria.Proteobacteria.Alphaproteobacteria.Rickettsiales.mitochondria.Other*  
 MB\_219 *Bacteria.Cyanobacteria.Synechococcophycidae.Synechococcales.Synechococcaceae.Synechococcus*  
 MB\_220 *Bacteria..Thermi..Deinococci.Deinococcales.Trueperaceae.Truepera*  
 MB\_221 *Bacteria.Planctomycetes.Planctomycetia.Planctomycetales.Planctomycetaceae.Planctomyces*  
 MB\_222 *Bacteria.Acidobacteria..Chloracidobacteria..RB41.Ellin6075.*  
 MB\_223 *Bacteria.Proteobacteria.Gammaproteobacteria.Enterobacteriales.Enterobacteriaceae.Other*  
 MB\_224 *Bacteria.Acidobacteria..Chloracidobacteria..RB41..*  
 MB\_225 *Bacteria.Proteobacteria.Gammaproteobacteria.Vibrionales.Vibrionaceae.Other*  
 MB\_226 *Bacteria.Actinobacteria.Actinobacteria.Actinomycetales..*  
 MB\_227 *Bacteria.Proteobacteria.Gammaproteobacteria.Other.Other.Other*  
 MB\_228 *Bacteria.Firmicutes.Bacilli.Lactobacillales.Aerococcaceae.Alkalibacterium*  
 MB\_229 *Bacteria.Other.Other.Other.Other.Other*  
 MB\_230 *Bacteria.Chloroflexi.Anaerolineae.SBR1031.A4b.*  
 MB\_231 *Bacteria.Fusobacteria.Fusobacteriia.Fusobacteriales.Fusobacteriaceae.Cetobacterium*  
 MB\_232 *Bacteria.Proteobacteria.Alphaproteobacteria.Rhizobiales.Xanthobacteraceae.*  
 MB\_233 *Bacteria.Firmicutes.Bacilli.Bacillales.Staphylococcaceae.Jeotgalicoccus*  
 MB\_234 *Bacteria.Bacteroidetes.Flavobacteriia.Flavobacteriales..Weeksellaceae..Cloacibacterium*  
 MB\_235 *Bacteria.Firmicutes.Bacilli.Bacillales.Bacillaceae.Bacillus*  
 MB\_236 *Bacteria.Firmicutes.Clostridia.Clostridiales.Peptostreptococcaceae.Other*  
 MB\_237 *Bacteria.Proteobacteria.Alphaproteobacteria.Caulobacterales.Caulobacteraceae.Other*  
 MB\_238 *Bacteria.Cyanobacteria.Chloroplast.Streptophyta..*  
 MB\_239 *Bacteria.Proteobacteria.Betaproteobacteria.Neisseriales.Neisseriaceae.*  
 MB\_240 *Bacteria.Proteobacteria.Alphaproteobacteria.Rhodobacteriales.Rhodobacteraceae.Other*  
 MB\_241 *Bacteria.Proteobacteria.Betaproteobacteria.Burkholderiales.Comamonadaceae.Other*  
 MB\_242 *Bacteria.Proteobacteria.Alphaproteobacteria.Rhizobiales.Bradyrhizobiaceae.Bradyrhizobium*  
 MB\_243 *Bacteria.Cyanobacteria.Chloroplast.CAB.I..*  
 MB\_244 *Bacteria.Planctomycetes.Planctomycetia.Pirellulales.Pirellulaceae.*  
 MB\_245 *Bacteria.Proteobacteria.Alphaproteobacteria.Rhodospirillales.Rhodospirillaceae.Skermanella*  
 MB\_246 *Bacteria.Proteobacteria.Gammaproteobacteria.Vibrionales.Vibrionaceae.Photobacterium*  
 MB\_247 *Bacteria.Cyanobacteria.Chloroplast.Stramenopiles..*  
 MB\_248 *Bacteria.Bacteroidetes..Saprosipirae...Saprosipirales..Chitinophagaceae.Sediminibacterium*

|        |                                                                                                     |
|--------|-----------------------------------------------------------------------------------------------------|
| MB_249 | <i>Bacteria.Proteobacteria.Alphaproteobacteria.Rhizobiales.Methylobacteriaceae.Methylobacterium</i> |
| MB_250 | <i>Bacteria.Actinobacteria.Actinobacteria.Actinomycetales.Corynebacteriaceae.Corynebacterium</i>    |
| MB_251 | <i>Bacteria.Actinobacteria.Actinobacteria.Actinomycetales.Micrococcaceae.Other</i>                  |
| MB_252 | <i>Bacteria.Proteobacteria.Alphaproteobacteria.Rhizobiales.Phylobacteriaceae.Phylobacterium</i>     |
| MB_253 | <i>Bacteria.Firmicutes.Bacilli.Bacillales.Staphylococcaceae.Staphylococcus</i>                      |
| MB_254 | <i>Bacteria.Proteobacteria.Gammaproteobacteria.Pseudomonadales.Moraxellaceae.Acinetobacter</i>      |
| MB_255 | <i>Bacteria.Proteobacteria.Alphaproteobacteria.Rhizobiales.Bradyrhizobiaceae.Other</i>              |
| MB_256 | <i>Bacteria.Proteobacteria.Alphaproteobacteria.Rhizobiales.Phylobacteriaceae.Other</i>              |
| MB_257 | <i>Bacteria.Actinobacteria.Actinobacteria.Actinomycetales.Micrococcaceae.Renibacterium</i>          |
| MB_258 | <i>Bacteria.Proteobacteria.Alphaproteobacteria.Sphingomonadales.Sphingomonadaceae.Sphingomonas</i>  |

---

<sup>a</sup> The number is consistent with that in **Figures 5 and S5**.

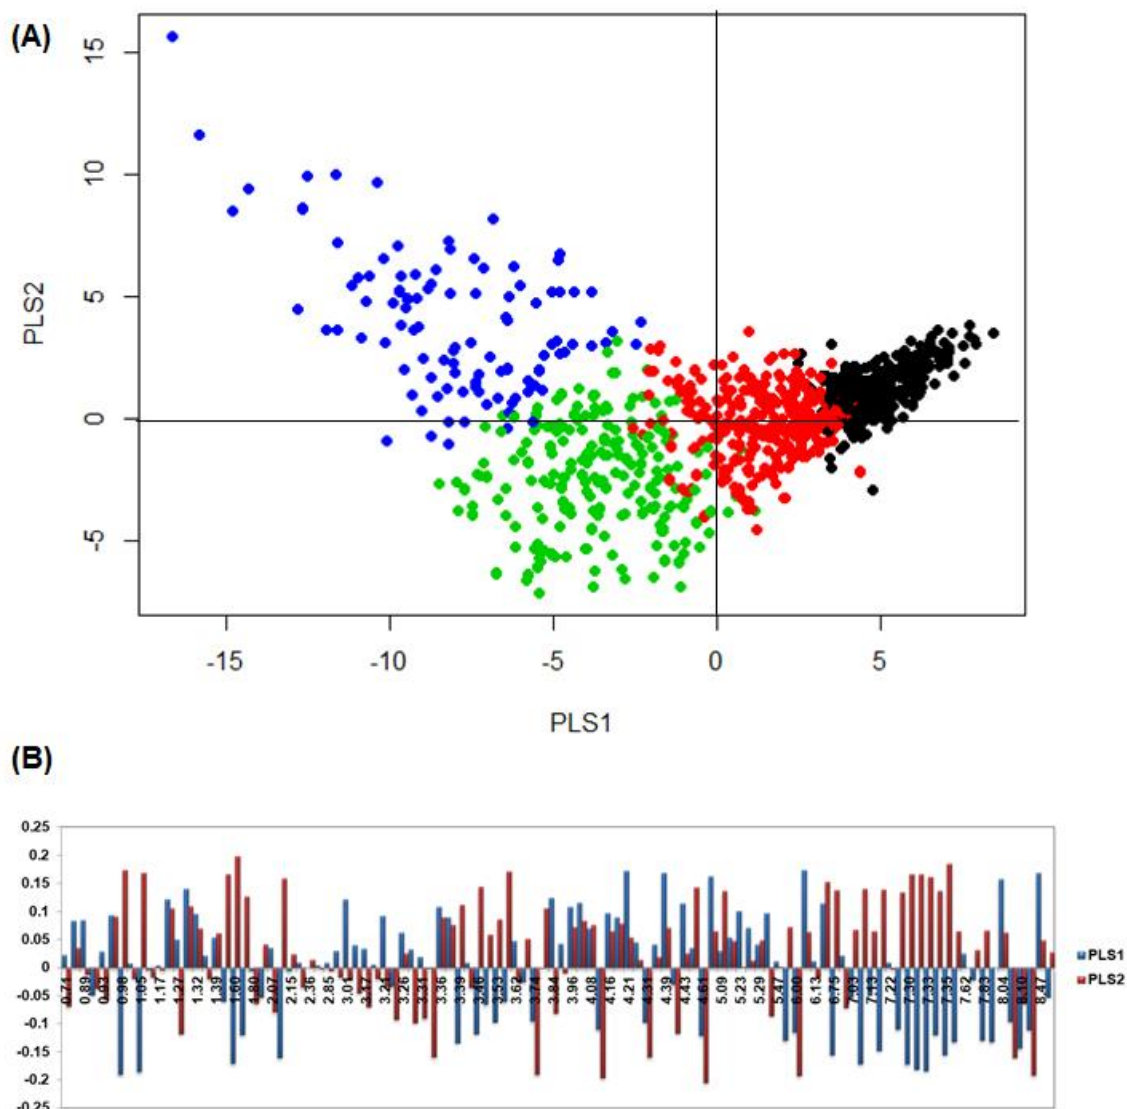

**Figure S1.** PLS-DA analysis of muscle NMR spectral data of yellowfin goby fish. **(A)** score plot; **(B)** loading plots of PLS1 and PLS2. The top 30 NMR peaks in the loading plots were assigned and summarized in Table S2. The color of groups was consistent with x-means clusters in Figures 2 and Tables S1.

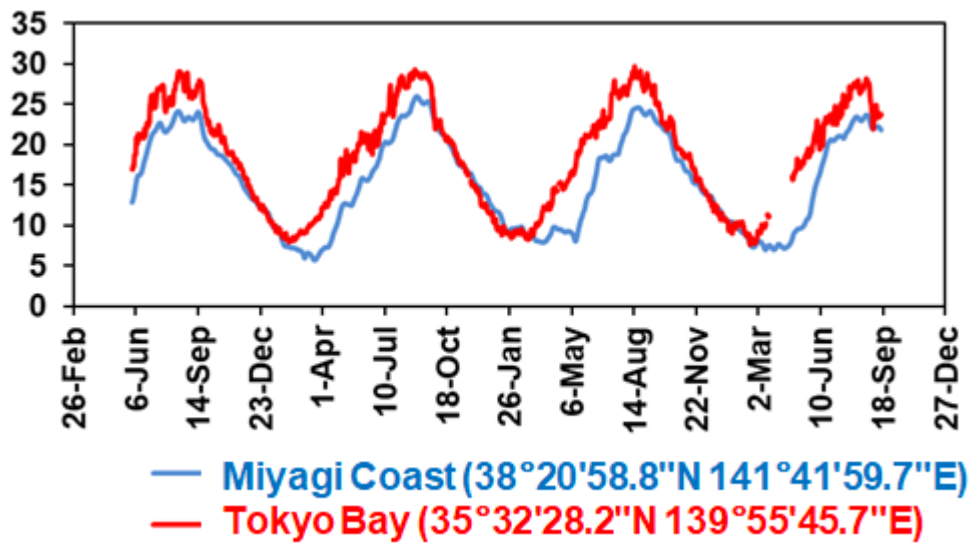

**Figure S2.** The available water temperature (upper layer) of Miyagi Coast and Tokyo Bay during the sampling period from 2011/05/31 to 2014/09/15. (Source: Ministry of Land, Infrastructure, Transport and Tourism. Kanto Regional Development Bureau. <http://www.tbeic.go.jp/MonitoringPost/Top>; Japan Meteorological Agency, <http://www.jma-net.go.jp/sendai/wadai/umi/engan.html>)

### Metabolic Profiling (NMR)

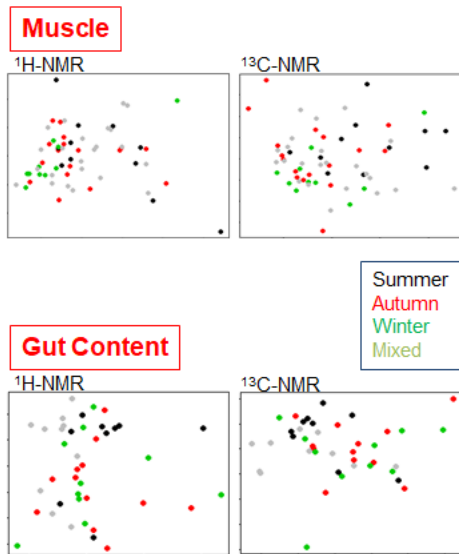

### Elemental Profiling (ICP-OES)

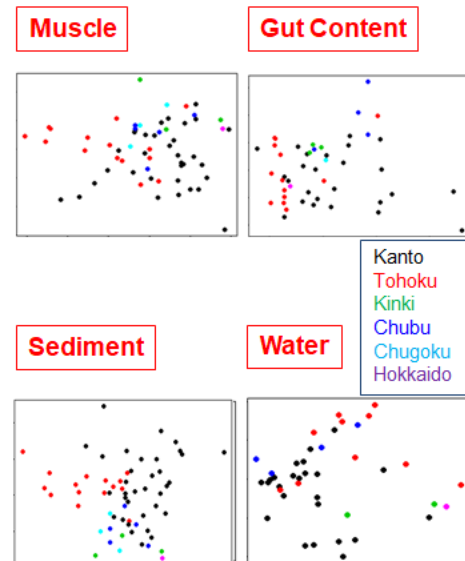

### Microbial Profiling (Miseq)

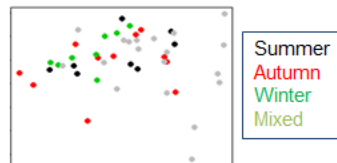

**Figure S3.** PCA score plots (PC1 vs. PC2) of NMR-based metabolic profiling, ICP-OES-based elemental profiling and Miseq-based microbial profiling of the living system of pooled yellowfin goby.

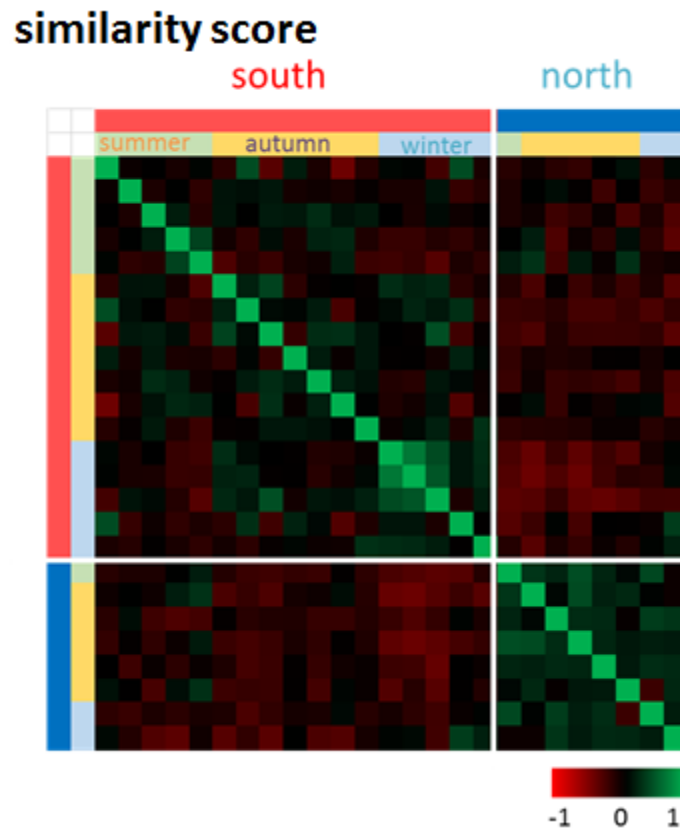

**Figure S4.** The similarity score of yellowfin goby ecosystems. The Spearman's correlations was calculated using the integrated datasets (yellowfin goby, symbiotic microbiota and inorganic environment).

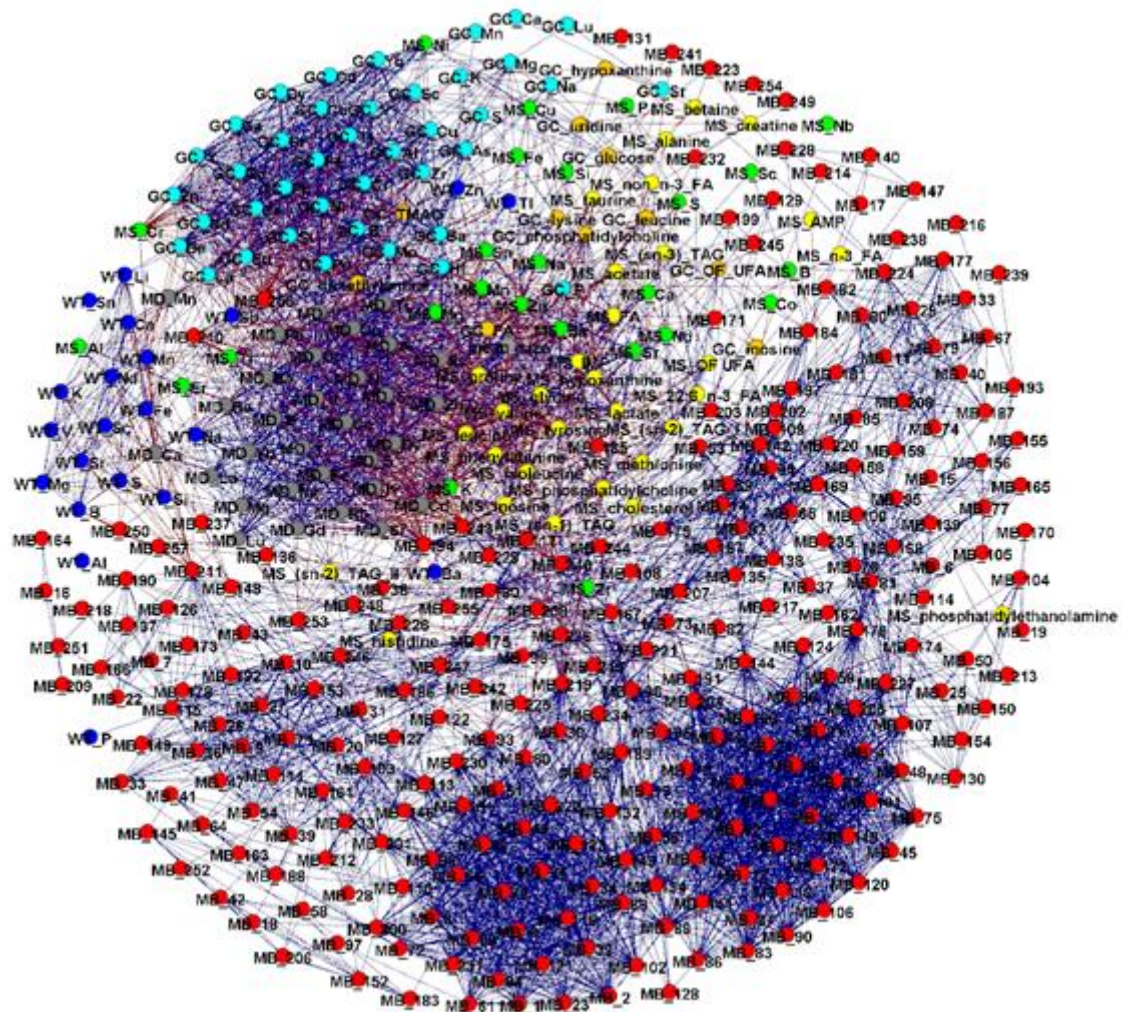

**Figure S5.** Correlation network analysis of metabolome, inonome and microbiome of the pooled yellowfin goby samples. Spearman’s correlation coefficients (cor) between variants of integral data sets were calculated, and correlations with  $|cor| > 0.5$  were selected as edges. MS, muscle; WT, water; MD, sediment; GT, gut content; MB, gut microbiota. The ID code of gut microorganism is consist with **Table S6**.

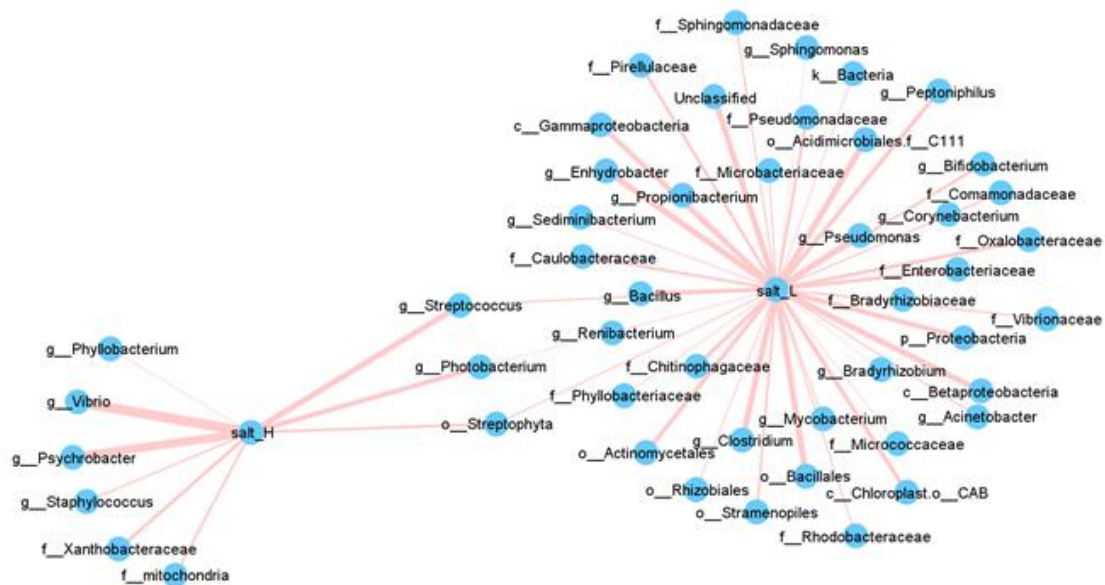

**Figure S6.** MBA network analyses of integral data sets obtained by pooled yellowfin goby, which partial highlighted by salinity with internal microbiota. Support = 0.625, confidence = 0.25, lift > 1. “\_L” indicates metabolites at low level, and “\_H” indicates metabolites at high level; “p\_”, “c\_”, “o\_”, “f\_” and “g\_” indicate Phylum, Class, Order, Family and Genus levels, respectively, which identified using NGS.



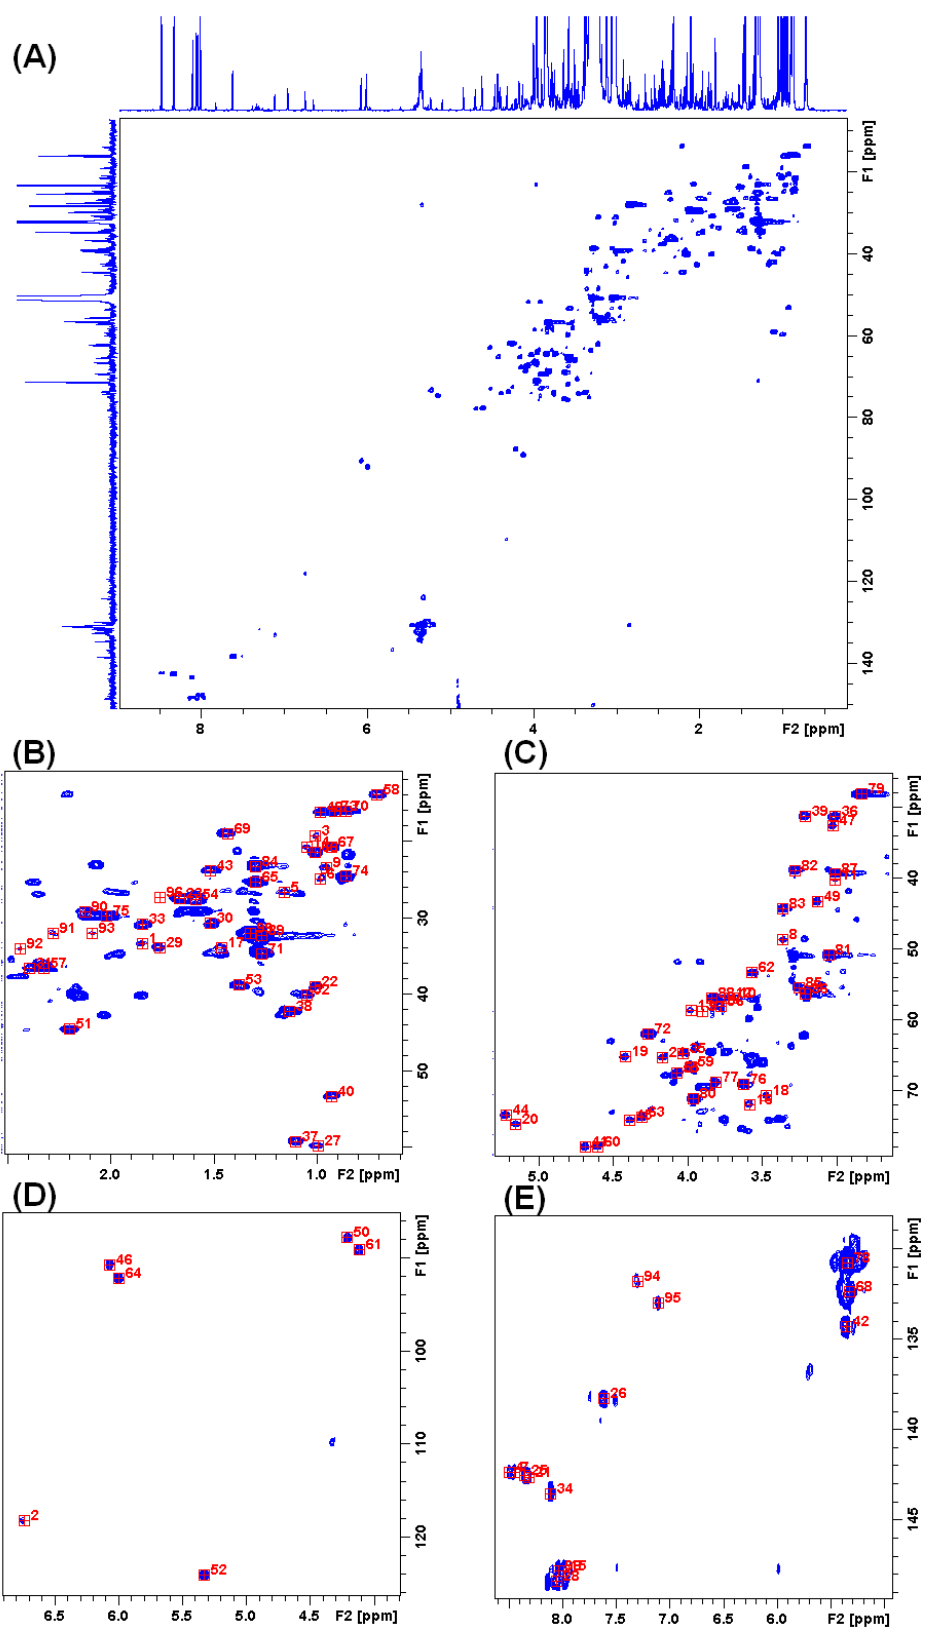

**Figure S7.** (A)  $^1\text{H}$ - $^{13}\text{C}$  HSQC spectrum and (B) ~ (E) expansions of yellowfin goby muscle extracts using methanol- $d_4$ . The peak IDs are consistent with those in **Table S5**.

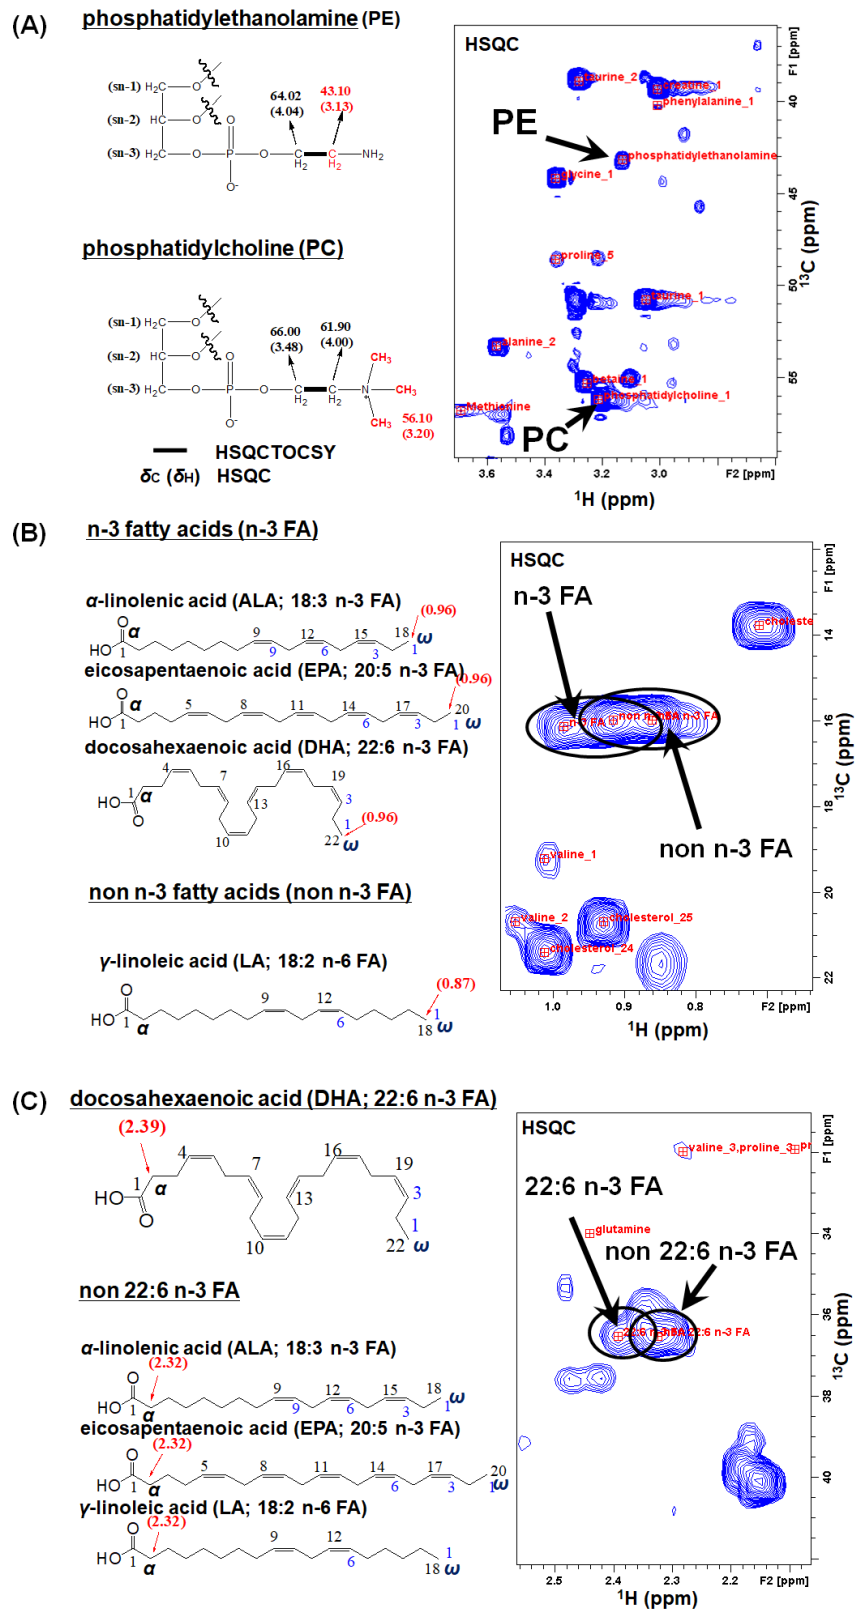

**Figure S8.** NMR signal annotation of lipids in yellowfin goby muscle extracts using methanol- $d_4$ . Distinguishable signals between (A) phosphatidylethanolamine and

phosphatidylcholine; **(B)** n-3 fatty acids and non n-3 fatty acids; **(C)** 22:6 n-3 fatty acid and non 22:6 n-3 fatty acids.
